# Supplementary material for: Factors influencing precision medicine knowledge and attitudes
Source: PubMed Central journal article supplement (PMC7657499; doi:10.1371/journal.pone.0234833), 2020-11-11
Supplement: pone.0234833.s001.pdf [file pone.0234833.s001.pdf]

# Barriers To Participation In Research

The next set of questions asks you about potential barriers to participating in research. Again, by clicking submit, you acknowledge that your participation in this survey is voluntary and confidential.

**Please indicate to what degree you agree or disagree with the following statements regarding participation in research.**

|                                                           | Strongly disagree     | Disagree              | Neither agree nor disagree | Agree                 | Strongly agree        |
|-----------------------------------------------------------|-----------------------|-----------------------|----------------------------|-----------------------|-----------------------|
| Participation in clinical research benefits society       | <input type="radio"/> | <input type="radio"/> | <input type="radio"/>      | <input type="radio"/> | <input type="radio"/> |
| Participation will mean better care                       | <input type="radio"/> | <input type="radio"/> | <input type="radio"/>      | <input type="radio"/> | <input type="radio"/> |
| Participation in research is risky                        | <input type="radio"/> | <input type="radio"/> | <input type="radio"/>      | <input type="radio"/> | <input type="radio"/> |
| Researchers do not care about me                          | <input type="radio"/> | <input type="radio"/> | <input type="radio"/>      | <input type="radio"/> | <input type="radio"/> |
| Participation in research is enjoyable                    | <input type="radio"/> | <input type="radio"/> | <input type="radio"/>      | <input type="radio"/> | <input type="radio"/> |
| Participation in research allows me to socialize          | <input type="radio"/> | <input type="radio"/> | <input type="radio"/>      | <input type="radio"/> | <input type="radio"/> |
| Participation in research is against my religion          | <input type="radio"/> | <input type="radio"/> | <input type="radio"/>      | <input type="radio"/> | <input type="radio"/> |
| Participation in research is morally wrong                | <input type="radio"/> | <input type="radio"/> | <input type="radio"/>      | <input type="radio"/> | <input type="radio"/> |
| Transportation is a problem for people who participate    | <input type="radio"/> | <input type="radio"/> | <input type="radio"/>      | <input type="radio"/> | <input type="radio"/> |
| Scientists cannot be trusted                              | <input type="radio"/> | <input type="radio"/> | <input type="radio"/>      | <input type="radio"/> | <input type="radio"/> |
| It is better to be treated by doctors who are researchers | <input type="radio"/> | <input type="radio"/> | <input type="radio"/>      | <input type="radio"/> | <input type="radio"/> |

---

Which of the following are barriers for you when considering participating in research? Check all that apply.

- Technical language on study materials (i.e. flyers, brochures, text messages, consent form, etc.)
- Cultural appropriateness of study materials (i.e. flyers, brochures, text messages, consent form, etc.)
- Burden to yourself or your family (i.e. time, cost, social acceptance)
- The feeling of being undervalued or poorly treated by health care system
- Limited access to research studies
- Personal attitude towards research in general
- Limited resources to participate in research (i.e. transportation, phone, internet, etc.)
- Lack of sensitivity from the researcher
- Lack of trust/mistrust/distrust
- Lack of motivation/willingness
- Fear
- Religious/spiritual beliefs
- Lack of awareness of studies (i.e. poor advertisement in your environment)
- The feeling that your health condition is stigmatized by society/health system/health providers (i.e. obesity, mental health, etc.)
- Restricted eligibility criteria (i.e. being turned away because you did not fit the screening criteria)
- Other

---

If other, please list:

\_\_\_\_\_

---

In my opinions, research in the United States is

- Ethical
- Not ethical
- Don't know
- Other

---

If other, please describe.

\_\_\_\_\_

---

Thank you. Please hit submit below to continue to the final section of the survey.
