# Supplementary material for: Factors influencing precision medicine knowledge and attitudes
Source: PubMed Central journal article supplement (PMC7657499; doi:10.1371/journal.pone.0234833), 2020-11-11
Supplement: pone.0234833.s003.pdf [file pone.0234833.s003.pdf]

# Trust in Medical Research

The last set of questions will help us understand your level of trust in research and researchers in general. Again, by clicking submit, you acknowledge that your participation in this survey is voluntary and confidential.

**The following twelve questions ask about your views on research. There are no right or wrong answers. For each statement below, please indicate how strongly you agree or disagree with it.**

|                                                                                                                           | Strongly disagree     | Disagree              | Neutral               | Agree                 | Strongly agree        |
|---------------------------------------------------------------------------------------------------------------------------|-----------------------|-----------------------|-----------------------|-----------------------|-----------------------|
| Doctors who do medical research care only about what is best for each patient                                             | <input type="radio"/> | <input type="radio"/> | <input type="radio"/> | <input type="radio"/> | <input type="radio"/> |
| Medical researchers treat people like "guinea pigs"                                                                       | <input type="radio"/> | <input type="radio"/> | <input type="radio"/> | <input type="radio"/> | <input type="radio"/> |
| It's safe to be in a medical research study                                                                               | <input type="radio"/> | <input type="radio"/> | <input type="radio"/> | <input type="radio"/> | <input type="radio"/> |
| Some doctors do medical research for selfish reasons                                                                      | <input type="radio"/> | <input type="radio"/> | <input type="radio"/> | <input type="radio"/> | <input type="radio"/> |
| Doctors tell their patients everything they need to know about being in a research study                                  | <input type="radio"/> | <input type="radio"/> | <input type="radio"/> | <input type="radio"/> | <input type="radio"/> |
| A doctor would never ask me to be in a medical research study if the doctor thought there was any chance it might harm me | <input type="radio"/> | <input type="radio"/> | <input type="radio"/> | <input type="radio"/> | <input type="radio"/> |
| There are some things about medical research that I do not trust at all                                                   | <input type="radio"/> | <input type="radio"/> | <input type="radio"/> | <input type="radio"/> | <input type="radio"/> |
| A doctor would never recommend something that is not the best treatment just so he or she can study how it works          | <input type="radio"/> | <input type="radio"/> | <input type="radio"/> | <input type="radio"/> | <input type="radio"/> |
| Medical researchers have no selfish reasons for doing research studies                                                    | <input type="radio"/> | <input type="radio"/> | <input type="radio"/> | <input type="radio"/> | <input type="radio"/> |
| Medical researchers do not tell people everything they really need to know about being in a research study                | <input type="radio"/> | <input type="radio"/> | <input type="radio"/> | <input type="radio"/> | <input type="radio"/> |
| The only reason doctors do medical research is to help people                                                             | <input type="radio"/> | <input type="radio"/> | <input type="radio"/> | <input type="radio"/> | <input type="radio"/> |

I completely trust doctors who do medical research

**Thank you for your input. Please let us know if you would like to receive more potential surveys in the future.**

Would you be willing to receive any follow-up surveys to your e-mail address in the future?

Yes  
 No
